# Supplementary material
Source: PubMed Central journal article supplement (PMC6948968)
Supplement: krnb-17-01-1670598-s001.pdf [file krnb-17-01-1670598-s001.pdf]

## Supplementary information for

### **Developmental changes of rRNA ribose methylations in the mouse**

Jade Hebras\*, Nicolai Krogh\*, Virginie Marty, Henrik Nielsen<sup>#</sup>, and Jérôme Cavaille<sup>#</sup>

\*authors contributed equally

<sup>#</sup>co-corresponding authors

The supplementary information contains:

Table S1

Table S2

Table S3

Supplementary Data 1

Supplementary Data 2

Figure S1

Figure S2

Figure S3

Figure S4

Figure S5

Supplementary references

**Table S1.** List of changes made to the curated mouse rDNA sequences based on reads obtained from RiboMeth-seq analyses. GenBank accession numbers for the original rDNA sequences are listed in the table and nucleotide numbers correspond to this. **Supplementary Data 1** contains a FASTA file with the corrected rDNA sequences.

**SSU** – GenBank accession: X00686.1

|                       |                        |        |  |
|-----------------------|------------------------|--------|--|
| T inserted after T287 | A inserted after G1228 | G1561A |  |
|-----------------------|------------------------|--------|--|

**LSU** – GenBank accession: NR\_003279.1

|                       |                        |                          |                        |
|-----------------------|------------------------|--------------------------|------------------------|
| C inserted after C251 | C497Δ                  | C586Δ                    | C inserted after C665  |
| A inserted after C829 | T1354C                 | G inserted after G1887   | T inserted after T1991 |
| G2019C                | C2020G                 | CGT inserted after G2322 | G2365Δ                 |
| T2368C                | G inserted after G2931 | G2950Δ                   | G inserted after G2967 |
| G3150Δ                | T3151Δ                 | C3233T                   | C3235Δ                 |
| C3753Δ                | G3754Δ                 | A3755G                   | G3756A                 |

**5.8S** – GenBank accession: K01367.1

|      |  |  |  |
|------|--|--|--|
| G23C |  |  |  |
|------|--|--|--|

**5S** – GenBank accession: M31319.1

|      |      |      |  |
|------|------|------|--|
| G38C | G43C | T69Δ |  |
|------|------|------|--|

**Table S2.** List of oligonucleotides used in the study.

| <b>Northern blotting analysis (rRNA and small RNA detection)</b>                   |                             |
|------------------------------------------------------------------------------------|-----------------------------|
| <b>Purpose</b>                                                                     | <b>Sequence</b>             |
| SNORD22 (mouse/human)                                                              | ATCCCTCAGACAGTTCCTTCTG      |
| SNORD44 (mouse)                                                                    | TCTTCAGGTAGTCAGTATTTGTTCCG  |
| SNORD44 (human)                                                                    | TTAGAGCTAATTAAGACCTTCATG    |
| SNORD47 (mouse)                                                                    | AACCTCAGAAATAAAATGGAACGGTTT |
| SNORD74 (mouse)                                                                    | CAGTTGTCCCTACCAACATAGCCTTC  |
| SNORD75 (mouse)                                                                    | CAGAAATCCCTTCTGTCCACTACTCT  |
| SNORD76 (mouse)                                                                    | AGCTGTCAAGAGTAGCAAATATGA    |
| SNORD78 (mouse/human)                                                              | TCAGACATTTGATCAACATCATTACA  |
| SNORD79 (mouse)                                                                    | TCAGAGAGATTCCCATCTGTTTAA    |
| SNORD79 (human)                                                                    | AGAGATTCCCATCTGCTTTAATTTT   |
| SNORD80 (mouse/human)                                                              | AGTCTGCTGAACTATGTTATCATCAT  |
| SNORD81 (mouse)                                                                    | AGTAATCAGTGAGAGAGTTCAAG     |
| SNORD126 (rat/mouse)                                                               | TGCTCAGCACATGTGTGTAATCA     |
| 7SK (mouse/human)                                                                  | GTGTCTGGAGTCTTGGGAAGC       |
| ITS1 – probe a (human)                                                             | TGGGTGTGCGGAGGGAAGC         |
| ITS2 – probe b (human)                                                             | ACGCCGCCGGTCTGCGCTTA        |
| SSU rRNA (human)                                                                   | CCAGACAAATCGCTCCACCAACTAAG  |
| LSU rRNA (human)                                                                   | GCTCCCGTCCACTCTCGAC         |
| <b>Primer extension (detection of rRNA ribose methylations)</b>                    |                             |
| LSU-Gm4593 (SNORD78)                                                               | GTCATAATCCCACAG             |
| LSU-Am1310 (SNORD126)                                                              | TTCGGACGAGCCCTGA            |
| <b>CRISPR/Cas9-mediated deletion of the human SNORD78 gene</b>                     |                             |
| sgRNA1                                                                             | CCTTGAGCATGTTTGGGAACG       |
| sgRNA2                                                                             | TTTGTCTACATGCTCATTTT        |
| <b>PCR (screening for CRISPR/Cas9-mediated deletion at the human SNORD78 gene)</b> |                             |
| Del_SNORD78_fd                                                                     | CCTTGAGCATGTCTGGAACAGTG     |
| Del_SNORD78_rv                                                                     | CTTACCCAAGCAAGTCATCCATG     |
| <b>RT-qPCR and RT-PCR (mouse Gas5 detection)</b>                                   |                             |
| Gas5_ex1_fd                                                                        | CGGAGCTGTGCGGCAT            |
| Gas5_ex3_fd                                                                        | TGTGGCAAAGGAGGATGAAGG       |
| Gas5_ex6_fd                                                                        | TGGAGTTTGAGGCTGGATAGAC      |
| Gas5_ex3_rv                                                                        | TCGTAAGCCTTCATCCTCCTTT      |
| Gas5_ex6_rv                                                                        | TTCAAAGTGTCTATCCAGCCTCA     |
| Gas5_ex7_rv                                                                        | GCAAGCCAGCCAAATGAACA        |
| Gas5_ex8_rv                                                                        | TGTTTGCAGTGCCTTCACTTG       |
| GAPDH_fd                                                                           | TGCACCACCAACTGCTTAG         |
| GAPDH_rv                                                                           | GGATGCAGGGATGATGTTT         |
| <b>RT-qPCR (human Gas5 detection)</b>                                              |                             |
| Gas5_fd                                                                            | CTTCTGGGCTCAAGTGATCC        |
| Gas5_rv                                                                            | TTGTGCCATGAGACTCCATCAG      |
| GAPDH_rv                                                                           | GAGTCCTTCCACGATACCAAAG      |
| GAPDH_fd                                                                           | TGGGTGTGAACCATGAGAAGTA      |

**Table S3.** List of methylated sites and their relative position in the rRNA sequences of human and mouse, respectively. Methylated positions in human rRNA are according to the sequences in the snoRNA-LMBE-database (1). Mouse positions are according to the corrected sequences from this study (**Supplementary Data 1** and **Table S1**).

#### SSU

| Human | Mouse |
|-------|-------|-------|-------|-------|-------|-------|-------|-------|-------|
| A27   | A27   | U354  | U356  | C517  | C519  | C797  | C799  | A1383 | A1385 |
| A99   | A99   | U428  | U430  | A576  | A578  | U799  | U801  | C1391 | C1393 |
| U116  | U116  | G436  | G438  | A590  | A592  | G867  | G869  | U1442 | U1444 |
| U121  | U121  | C462  | C464  | G601  | G603  | A1031 | A1033 | G1447 | G1449 |
| A159  | A159  | A468  | A470  | U627  | U629  | C1272 | C1274 | G1490 | G1492 |
| A166  | A166  | A484  | A486  | G644  | G646  | U1288 | U1290 | A1678 | A1680 |
| U172  | U172  | G509  | G511  | A668  | A670  | U1326 | U1328 | C1703 | C1705 |
| C174  | C174  | A512  | A514  | G683  | G685  | G1328 | G1330 | U1804 | U1806 |

#### LSU

| Human | Mouse  | Human | Mouse | Human | Mouse | Human | Mouse | Human | Mouse |
|-------|--------|-------|-------|-------|-------|-------|-------|-------|-------|
| A389  | A398   | G2351 | G2122 | C3680 | C3360 | C3866 | C3546 | U4468 | U4151 |
| A391  | A400   | C2352 | C2123 | A3697 | A3377 | G3878 | G3558 | G4469 | G4152 |
| G1303 | G1131  | A2350 | A2121 | G3606 | G3286 | C3848 | C3528 | G4464 | G4147 |
| A1310 | A1138* | A2388 | A2159 | A3703 | A3383 | U3904 | U3584 | A4493 | A4176 |
| A1313 | A1141  | U2402 | U2173 | G3723 | G3403 | G3923 | G3603 | C4506 | C4189 |
| C1327 | C1155  | C2409 | C2180 | A3739 | A3419 | G4020 | G3695 | A4541 | A4224 |
| G1509 | G1336  | G2411 | G2182 | A3764 | A3444 | C4032 | C3707 | A4560 | A4243 |
| A1511 | A1338  | A2774 | A2545 | G3771 | G3451 | G4166 | G3849 | G4588 | G4271 |
| A1521 | A1348  | C2791 | C2562 | C3787 | C3467 | U4197 | U3880 | U4590 | U4273 |
| G1612 | G1439  | A2802 | A2573 | U3797 | U3477 | G4198 | G3881 | G4593 | G4276 |
| G1747 | G1563  | C2811 | C2582 | A3804 | A3484 | U4276 | U3959 | G4607 | G4290 |
| A1858 | A1674  | U2824 | U2595 | A3809 | A3489 | G4340 | G4023 |       |       |
| C1868 | C1684  | C2848 | C2619 | C3820 | C3500 | G4362 | G4045 |       |       |
| C2338 | C2109  | G2863 | G2634 | A3846 | A3526 | C4426 | C4109 |       |       |

#### 5.8S

| Human | Mouse | Human | Mouse |
|-------|-------|-------|-------|
| U14   | U14   | G75   | G75   |

\*No evidence for methylation at LSU-A1310 in mouse, but the site is detected in human and rat.

**Supplementary Data 1.** Mouse rDNA sequence. A FASTA file with the mouse rDNA reference sequence used for mapping of sequencing reads is deposited at NCBI Gene Expression Omnibus (GEO) and accessible through GSE128947.

**Supplementary Data 2.** RiboMeth-seq scores and statistics. An excel sheet with raw read-end data, calculated RiboMeth-seq scores, and information on 2'-O-Me sites that have been subjected to barcode correction (2) is deposited at NCBI Gene Expression Omnibus (GEO) and accessible through GSE128947.

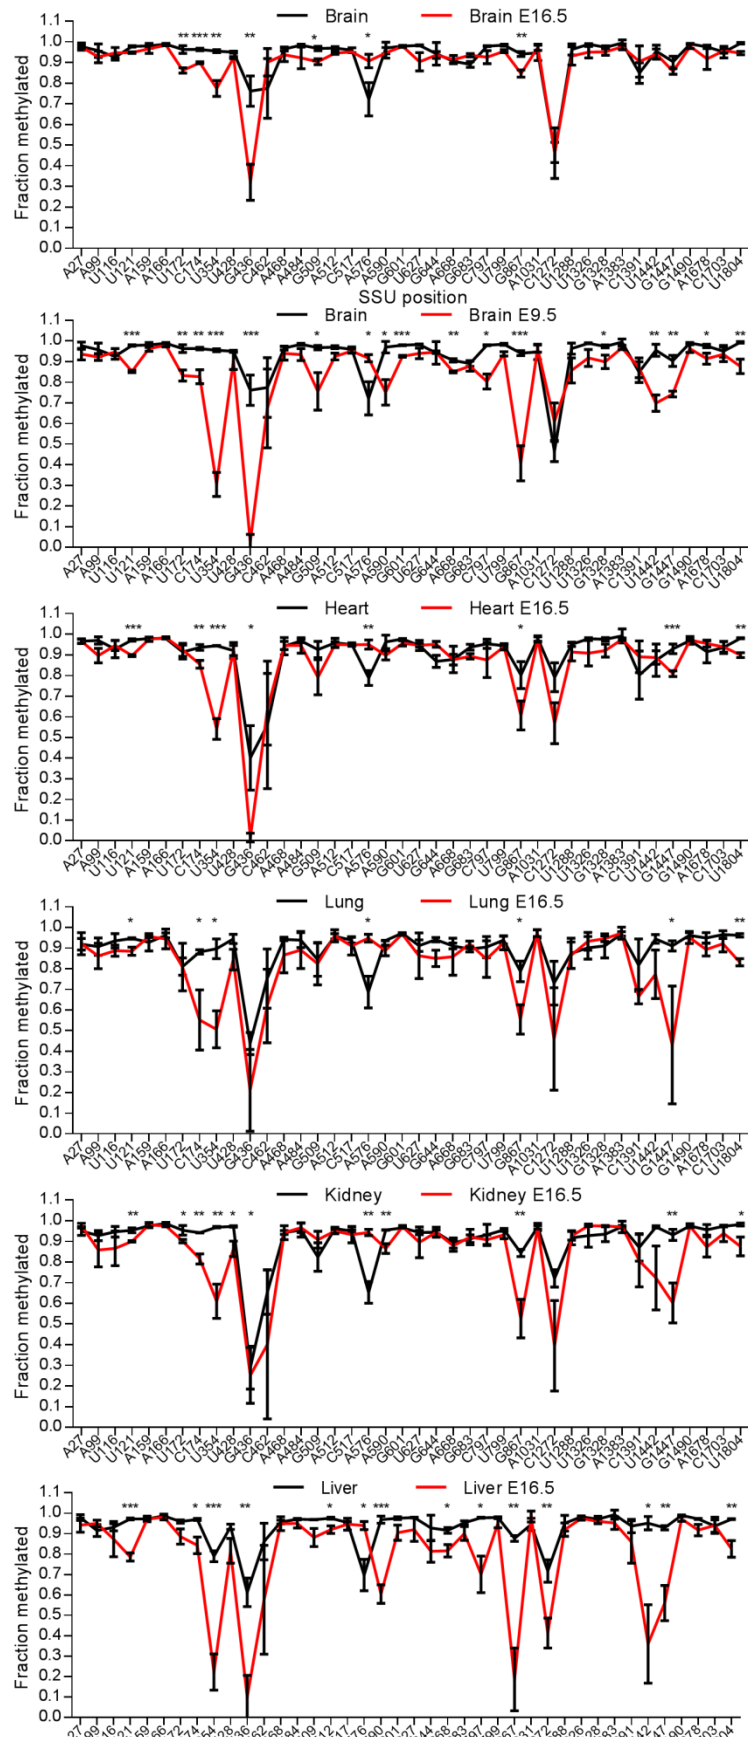

**Figure S1.** Stoichiometry of methylation at all 2'-O-Me sites in SSU rRNA in whole cell RNA isolated from adult tissues and developmental stages. Brain E9.5 corresponds to the whole head from stage E9.5.

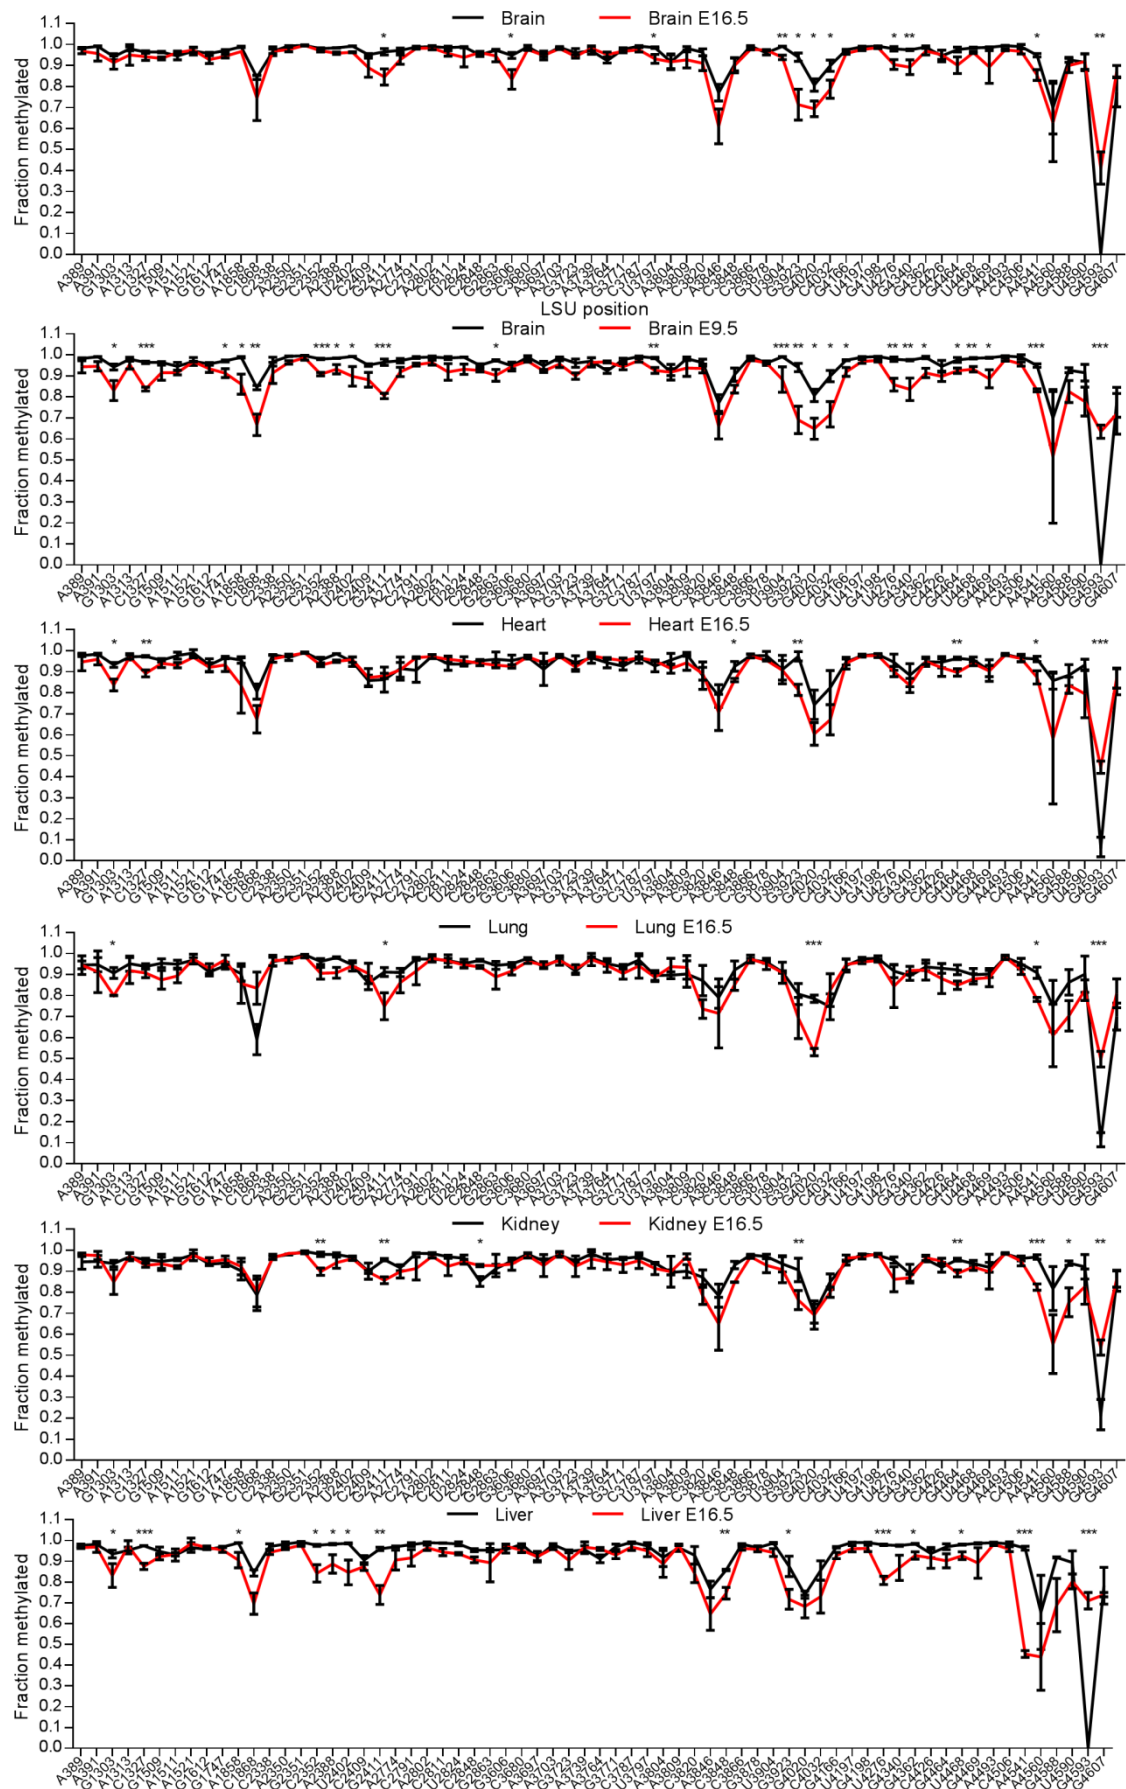

**Figure S2.** Stoichiometry of methylation at all 2'-O-Me sites in LSU rRNA in whole cell RNA isolated from adult tissues and developmental stages. Brain E9.5 corresponds to the whole head from stage E9.5.

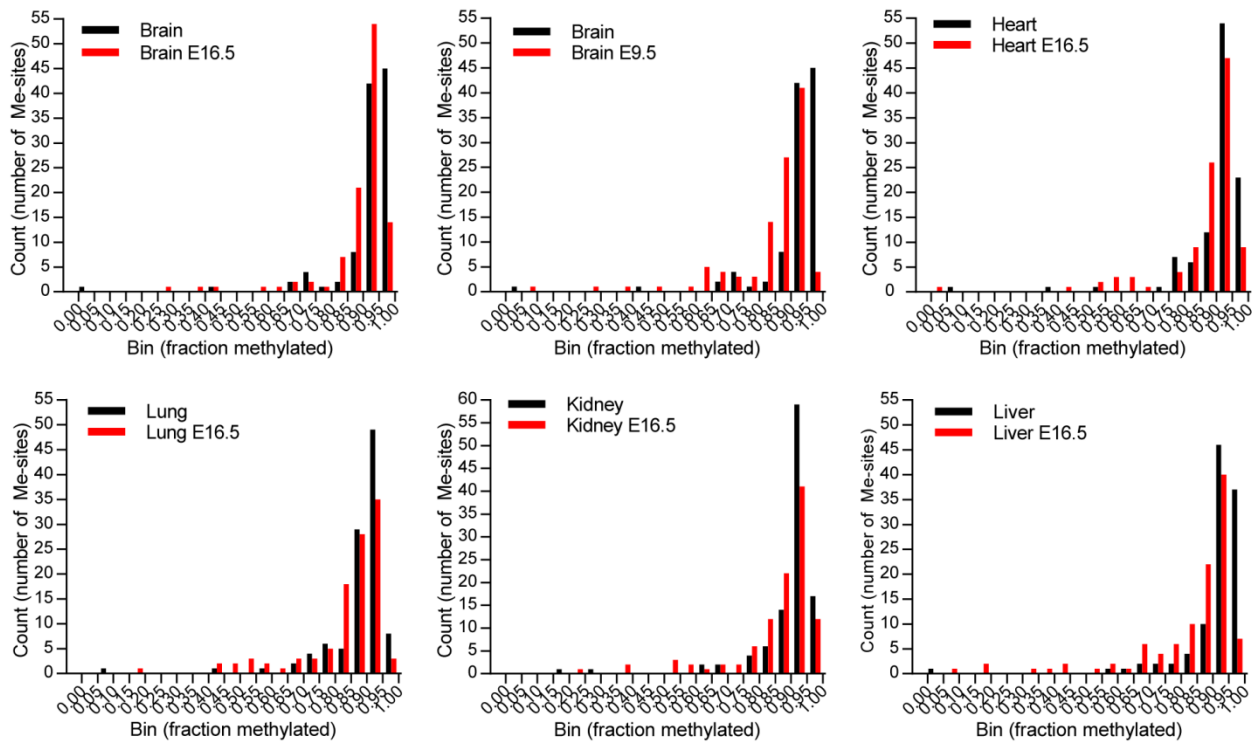

**Figure S3.** Bin diagrams of fraction methylated for all 2'-O-Me sites in 28S, 18S, and 5.8S rRNA from all adult and developmental tissues. Brain E9.5 corresponds to the whole head from stage E9.5.

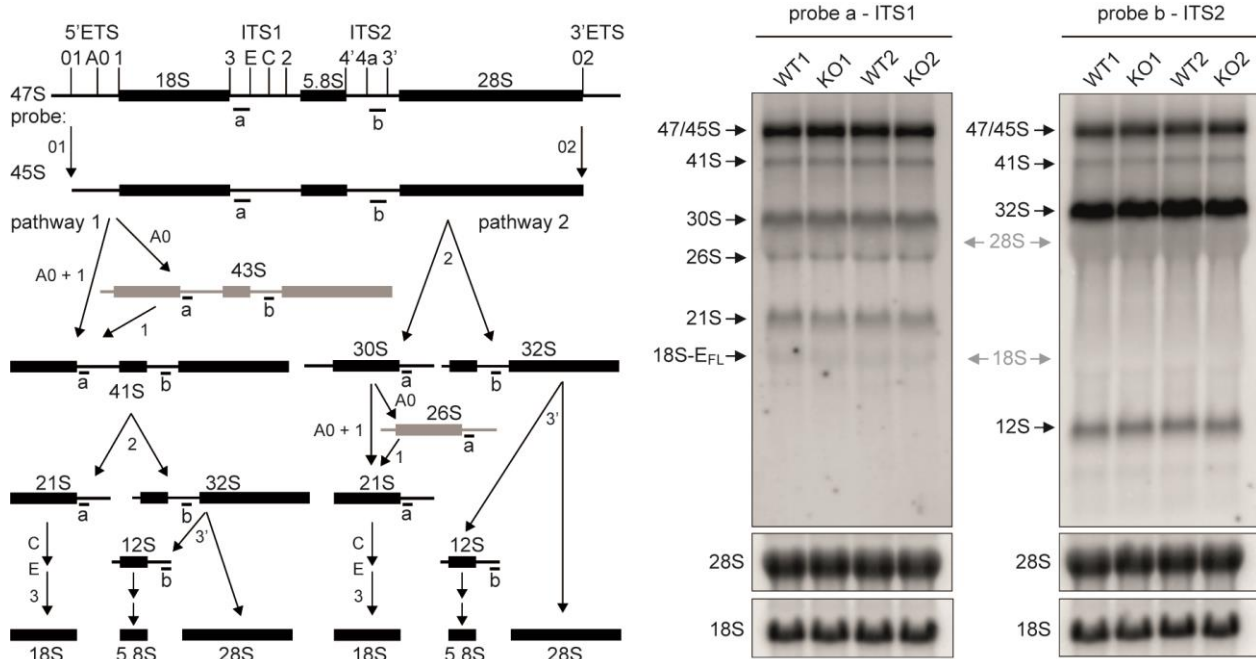

**Figure S4.** Pre-rRNA processing in WT HEK293T and SNORD78 knockout cells. To the left is shown an illustration of the human pre-rRNA transcript with annotated processing sites and a simplified diagram of the two main processing pathways, and with short lived intermediates in grey. The hybridization sites of probes a and b targeting ITS1 and ITS2, respectively, are indicated on the processing map. The right part of the figure shows northern blotting analyses of parallel gel runs of whole cell RNA samples from two WT HEK293T and two SNORD78 knockout cell cultures hybridized with either probe a or probe b. Black arrows indicate processing intermediates, while grey arrows indicate the migration of 28S and 18S rRNA inferred from re-hybridizing the membranes with probes targeting these rRNA species.

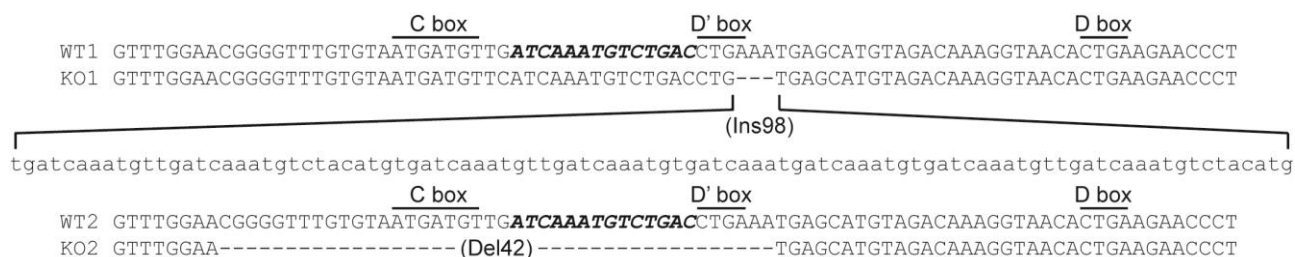

**Figure S5.** Sequences of SNORD78 in WT and SNORD78 knockout cell lines. PCR products from the KO1 cell line was cloned and 5 individual clones were sequenced. All gave the same sequence with an insertion of 98 nucleotides between the C box and the antisense element upstream of the D box. 3 individual clones of PCR products from the KO2 cell line showed the same sequence with a 42 nucleotide deletion spanning the C box. The antisense element base pairing with rRNA guiding methylation at LSU-G4953 is shown in bold italic.

### Supplementary references

1. Lestrade L, Weber MJ. snoRNA-LBME-db, a comprehensive database of human H/ACA and C/D box snoRNAs. *Nucleic acids research*. 2006;34(Database issue):D158-62.
2. Krogh N, Kongsbak-Wismann M, Geisler C, Nielsen H. Substoichiometric ribose methylations in spliceosomal snRNAs. *Organic & Biomolecular Chemistry*. 2017;15(42):8872-6.
